# Supplementary material
Source: PubMed Central journal article supplement (PMC11028789)
Supplement: 262_2013_1413_MOESM1_ESM.pdf [file 262_2013_1413_MOESM1_ESM.pdf]

**Cancer Immunology, Immunotherapy, Holger N. Lode et al. (submitted in 2012).**

**Suppl. Table 1**

Primer sequences used for amplification of variable heavy (VH) and light (VL) chain regions of ganglidiomab.

| <i>Primer</i> | <i>Sequence 5' → 3'</i>                                                   |
|---------------|---------------------------------------------------------------------------|
| IgG1          | VH constant region<br>ATAGACAGATGGGGGTGTCGTTTTGGC                         |
| MH1           | FR1 region VH<br>SARGTNMAGCTGSAGSAGTC                                     |
| MH2           | SARGTNMAGCTGSAGSAGTCWGG                                                   |
| MH3           | CAGGTTACTCTGAAAGWGTSTG                                                    |
| MH4           | GAGGTCCARCTGCAACARTC                                                      |
| MH5           | CAGGTCCAACVCAGCARCC                                                       |
| MH6           | GAGGTGAASSTGGTGAATC                                                       |
| MH7           | GATGTGAACTTGAAGTGTC                                                       |
| Kc            | VL κ constant region<br>GGATACAGTTGGTGCAGCATC                             |
| Mk            | FR1 region κ-light chain<br>GAYATTGTGMTSACMCARWCTMCA                      |
| RPHJ          | J-sequence VH<br><u>gctagc</u> TGAGGAGACGGTGACTGAGGTTCC                   |
| MHALT1.RV     | Leadersequence VH<br><u>gaattc</u> <b>cacc</b> ATGGRATGSAGCTGKGTMATSCTCTT |
| MHALT2.RV     | <u>gaattc</u> <b>cacc</b> ATGRAC TTCGGGYTGAGCTKGGTTTT                     |
| MHALT3.RV     | <u>gaattc</u> <b>cacc</b> ATGGCTGTCTTGGGGCTGCTCTTCT                       |
| MHALT4.RV     | <u>gaattc</u> <b>cacc</b> ATGGRCAGRCTTACWTYY                              |
| RPLJ          | J-sequence VL<br><u>gcagatgctgc</u> AGCCCGTTTGATTTCAGCTTGGTG              |
| MLALT1.RV     | Leadersequence VL κ<br><u>ctcgag</u> <b>cacc</b> ATGGAGACAGACACTCCTGCTAT  |
| MLALT2.RV     | <u>ctcgag</u> <b>cacc</b> ATGGATTTTCAGGTGCAGATTTTCAG                      |
| MLALT3.RV     | <u>ctcgag</u> <b>cacc</b> ATGRAGTCACAKACYCAGGTCTTYRTA                     |
| MLALT4.RV     | <u>ctcgag</u> <b>cacc</b> ATGAGGKCCCCWGCTCAGYTYCTKGGR                     |
| MLALT5.RV     | <u>ctcgag</u> <b>cacc</b> ATGAAGTTGCCTGTTAGGCTGTTG                        |
| MLALT6.RV     | <u>ctcgag</u> <b>cacc</b> ATGATGAGTCCTGCCAGTTCC                           |

Restriction sites *NheI* (GCT AGC), *EcoRI* (GAA TTC), *XhoI* (CTC GAG) and *BstAPI* (GCA NNNNN TGC) (underlined) and Kozak-sequence (bold) are indicated.

**Suppl. Table 2.** Screening results after 5 rounds of subcloning of the primary hybridoma cell culture.

| Material tested                            | ch14.18 <sup>†</sup> | hu14.18 <sup>†</sup> |
|--------------------------------------------|----------------------|----------------------|
| Supernatant clone 17 <sup>§</sup>          | 1.068 ± 0.052        | 0.631 ± 0.020        |
| Supernatant clone 17-9 <sup>§</sup>        | N.D.                 | 1.490 ± 0.022        |
| Supernatant clone 17-9-1 <sup>§</sup>      | 1.851 ± 0.048        | 1.988 ± 0.091        |
| Supernatant clone 17-9-1-1 <sup>‡</sup>    | N.D.                 | 1.441 ± 0.008        |
| Supernatant clone 17-9-1-5 <sup>‡</sup>    | N.D.                 | 1.427 ± 0.010        |
| Supernatant clone 17-9-1-1-12 <sup>‡</sup> | N.D.                 | 0.683 ± 0.025        |
| Serum of immunized mice <sup>&amp;</sup>   | 0.261 ± 0.038        | 0.192 ± 0.014        |
| Negative control <sup>#</sup>              | 0.005 ± 0.001        | 0.001 ± 0.001        |

The supernatant of clone 17 (50 µl) was used undiluted<sup>§</sup> and diluted<sup>‡</sup> (1:200; PBS, pH 7.4) in the screening ELISA using ch14.18 and hu14.18 as a capture antigen, respectively.

<sup>&</sup>Serum of immunized mice was used after dilution of 1:100 in PBS.

<sup>#</sup>Cell culture supernatant of Sp2/0 cells was used as negative control

<sup>†</sup>Data represent MV ± SD of OD 405 readings
